# Supplementary material
Source: PubMed Central journal article supplement (PMC5393954)
Supplement: NIHMS819141-supplement-Supp_AppendixS1.pdf [file NIHMS819141-supplement-Supp_AppendixS1.pdf]

**Appendix S1.** Experiences of women living in Ireland and Northern Ireland both with pregnancies they did not want or felt they could not keep and with at-home medical TOP

**Theme 1: Access to TOP is Essential for Women in Ireland and Northern Ireland Across a Wide Range of Circumstances**

- "As a 36 year-old women who had finished her family I was distraught at being pregnant and you really helped me through a very difficult time. I don't what I would have done without you."
- "I am very grateful. I had always felt I couldn't personally have an abortion but I felt there are always situations where it needs to be an option for people. My situation was that I have two healthy kids and though in an ideal world I would love to have loads more, financially we cannot afford it."
- "I don't think it's fair that women in Ireland can't receive an abortion. My husband was diagnosed with leukemia when I had just found out I was pregnant. To go through with the pregnancy wasn't an option for us. I already have a baby and I wouldn't have been able to cope. I am so grateful for your help."
- "This service is absolutely critical. It means women can take control of their lives and in my circumstance it has empowered me as a mother to ensure I can focus the little resources I do have on my existing child. You gave me another chance to continue my personal battle as a single mother to create a good quality of life for my child, working hard in 3 jobs to make ends meet and create opportunities and potential for her future. If this service had not been available I despair to think of the consequences for us. It would have undone the hard work I've put in over the last 4 years to try to work my way out of poverty and isolation. We have a chance now to build upon what achievements and stability I've been able to create."
- "This was a difficult decision to have to make because of my religious beliefs but I feel it is very important that women should have the same choice regardless of where in the world they live. This website made the process so much less stressful than having to travel."
- "I would like to thank you from the bottom of my heart for all you have done for me. I'm 25 years old and I'm doing nursing at uni so my boyfriend and I could not provide for a baby at the moment. If it wasn't for this option, I would have had to give up my dreams of becoming a nurse at this young age."
- "All my life I have been anti-abortion. I cannot believe how ignorant I was. I think medical abortion meds for early abortions should be made available to all women. I cannot thank you enough for your help and support."
- "I have different opinion about abortion now, thanks to your service. I felt like I was not alone through the whole ordeal of my pregnancy."

## **Theme 2: Women in Ireland and Northern Ireland with Few Resources Face Inequities in Their Ability to Access TOP**

- "May I thank you, from the very bottom of my heart, for providing women like me in this backward country, with this safe and very necessary service. Your service has provided me the ability to have a safe abortion, in my home, without the added worry of travelling to a foreign country and the level of stress and financial worry that would entail."
- "I would like to say I am extremely grateful for all the help and support I have received from you. This service really helps people in my situation who otherwise would have found it impossible to find to money for an abortion and be forced to continue the trauma of an unwanted pregnancy."
- "In Ireland it is illegal to get an abortion and it costs about £800 for the surgical procedure in the UK. I could never have afforded that. I am so delighted that this pregnancy ordeal is all over. Overall I would like to thank you for being there in my time of need. You were so reassuring when I was so worried and upset."
- "This is such a vital service for women who cannot afford expensive abortion fees, for migrant women like me who cannot travel in the first place, and for women for whom the stigma attached to abortion is a barrier to seeking help."
- "Most women in this country find it difficult to ask for help or advice about abortion because of the judgment. This option represents to many women (as it did to me) the only way of carrying out an abortion without overwhelming trauma and expense-money some people just don't have. I had also booked an appointment with a clinic in Liverpool just in case. On the day I would have been due to travel, the flights were all cancelled. I would not have been able to make my appointment and would have been too late for an early medical abortion, a surgical abortion would have been my only option then, which would have been too expensive for me to afford. You are a beacon of sanity."
- "I felt extremely grateful for this service. I would have had to pay upwards of £1000 to go abroad and have the procedure. I don't have that kind of money and would not have been able to explain a trip away to my family. I am so thankful to your service. It just was not the right time for a child for me, but now I can look forward to the future."
- "If it wasn't for you I don't know what I would have done. I could never afford to travel to the UK for an abortion. Several friends of mine have had an abortion and they all have the same story about how traumatic it is to travel abroad, I got the option of having it in my home, which was a safe, secure, comfortable environment. I will never regret this decision I have made."
- "There is no way I could have afforded to travel to England, pay for the procedure, stay in a hotel, and have someone there to support me. With your help I was able to have a safe abortion in an environment where I felt comfortable and with my partner there to support me. Thank you for enabling women to have control over their own bodies."

### **Theme 3: The Consequences of Not Having Legal Access to Safe TOP in Ireland and Northern Ireland Can be Severe**

- "I honestly don't feel I would be here now if this help had not been available to me. I would not have been able to find an excuse or funds to leave the country to travel overseas for it. I have 6 children and a husband who would never have allowed it. You have saved my life. I am eternally grateful."
- "I can't thank you enough you have saved my life. I would have had to resort to desperate measures. You will never understand how grateful I am."
- "Thank you for everything you have done for me. My life was in a mess because of my unwanted pregnancy and now I have been able to find a job and am getting back on track. I can't thank you enough. My life would have been destroyed if I had to go through with the pregnancy."
- "I was an emotional wreck and I had nobody to turn to. I never thought I'd be in this situation and couldn't tell my partner or my family. I don't regret my decision. It was the only choice I had, but it hurts me to think I had no other way to get the abortion."
- "I am so very grateful. You saved me from shame and disgrace because of my pregnancy and also possible death because I would have tried something unsafe if I could not find help."
- "I feel like this service saved my life. Without it I would have had to find a way to get over to the UK which would have cost more than £800 sterling. I would probably have turned to a desperate option."
- "Thank you so much for your help. I know that I would have took my own life if I had never got your help. Because of you I am thankful to be in a happy place in my mind and life."
- "I was in a horrible situation and I was terrified that I would be forced to go through with the pregnancy. If I had been forced to continue, my mental health would have been at serious risk."

#### **Theme 4: Women are Angry About Their Lack of Reproductive Rights in Ireland and Northern Ireland**

- "Women must be able to make this decision. It's our body. It's us that live with the feelings. In Ireland, they think they have the right to make the choice for us."
- "Abortion is a huge decision for some woman to make. It's shameful that we are met with brick walls and judgment in our own country."
- "I'm so grateful for this option. I already have two small kids and had just started a new job when I found out I was pregnant. Another child was not an option. Ireland is a very backward country sometimes. Women are still treated like stupid, second-class citizens. I'm so grateful for this non-judgmental and supportive service to women."
- "I am very grateful to have found this service but I am saddened that women have to dig around for this information feeling alone and scared. Doctors should give women this information and the law should change to give us the right to choose."
- "I am extremely grateful this service exists. Ireland's Anti-Choice agenda puts women's lives in danger everyday and it is so appreciated to have control over my health and my life put back in my hands."
- "I felt incredibly grateful to have this service, which greatly dissipated my previous anger and rage at the inequitable rights of women in Northern Ireland. My rights, as a women are greatly impeded by my local government, and in my view, the restriction of abortion in this country can lead to overwhelming distress, depression, despair. In that respect the law is a brutality against women."
